# Supplementary material
Source: PubMed Central journal article supplement (PMC5337148)
Supplement: NIHMS848183-supplement.pdf [file NIHMS848183-supplement.pdf]

**SUPPLEMENTAL MATERIAL****The effect of PKA-mediated phosphorylation of ryanodine receptor on SR  
Ca<sup>2+</sup> leak in ventricular myocytes**

Elisa Bovo, Sabine Huke, Lothar A. Blatter and Aleksey V. Zima

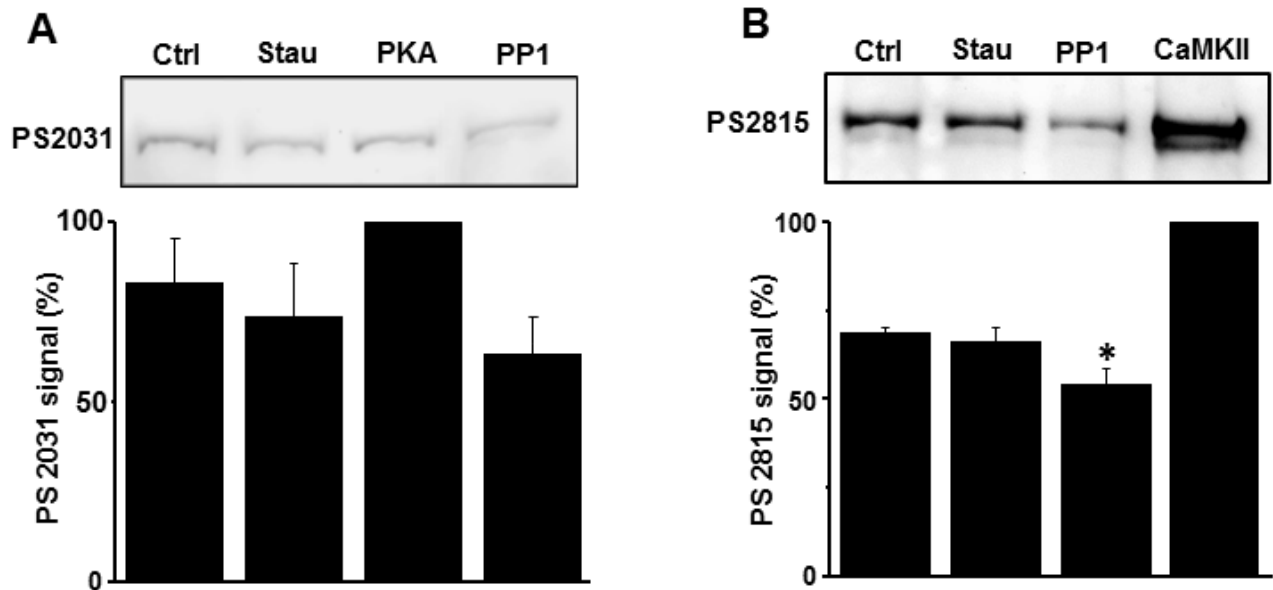

**Changes in RyR2 phosphorylation at Ser-2031 and Ser-2815.** **A**, representative Western blot and averaged data (n=3) showing effects of staurosporine (Stau; 1  $\mu$ M), PKA activation with cAMP (10 mM) and PP1 (2 U/ml) on RyR2 phosphorylation at the PKA site (Ser-2031) in permeabilized myocytes. Changes in phosphorylation were compared to the level of phosphorylation during PKA activation. **B**, representative Western blot and averaged data (n=3) showing effects of staurosporine (Stau; 1  $\mu$ M), PP1 (2 U/ml) and CaMKII activation with Ca-calmodulin on RyR2 phosphorylation at the CaMKII site (Ser-2815) in permeabilized myocytes. Changes in phosphorylation were compared to the level of phosphorylation during CaMKII activation. Changes in RyR2 phosphorylation level at the PKA sites (Ser 2031) and the CaMKII site (Ser 2815) were quantified using phospho-specific antibodies PS2031 and PS2815 (Badrilla, Leeds, UK). \*P<0.05 vs Ctrl.
